# Supplementary material for: Marriage–Divorce Dynamics in Azerbaijan, 2014 – 2023: A Time-Series Study
Source: Research Square preprint supplement (doi:10.21203/rs.3.rs-7142167/v1), 2025-09-11
Supplement: Supplementary file 1 [file 9960396de11853bfcb8e12ce.docx]

Dear Editor,

All data processed and analyzed are available via links below. All Dataset links have been checked and included in references of main manuscript under following numbers:

19. [https://www.azstat.gov.az/portal/tblInfo/TblInfoList.do#](https://www.azstat.gov.az/portal/tblInfo/TblInfoList.do)

20. <https://www.azstat.gov.az/portal/tblInfo/TblInfoList.do#994_006>

21. <https://www.azstat.gov.az/portal/populationPyramid/populationPyramid.do> 22. [https://www.azstat.gov.az/portal/tblInfo/TblInfoList.do#](https://www.azstat.gov.az/portal/tblInfo/TblInfoList.do)

23. [https://azstat.gov.az/statHtml/statHtml.do?orgId=994&tblId=DT_AA_004&conn_path=I](https://azstat.gov.az/statHtml/statHtml.do?orgId=994&tblId=DT_AA_004&conn_path=I2) [2](https://azstat.gov.az/statHtml/statHtml.do?orgId=994&tblId=DT_AA_004&conn_path=I2)

24. [https://azstat.gov.az/statHtml/statHtml.do?orgId=994&tblId=DT_AA_006&conn_path=I](https://azstat.gov.az/statHtml/statHtml.do?orgId=994&tblId=DT_AA_006&conn_path=I2) [2](https://azstat.gov.az/statHtml/statHtml.do?orgId=994&tblId=DT_AA_006&conn_path=I2)

25. [https://azstat.gov.az/statHtml/statHtml.do?orgId=994&tblId=DT_AA_015&conn_path=I](https://azstat.gov.az/statHtml/statHtml.do?orgId=994&tblId=DT_AA_015&conn_path=I2) [2](https://azstat.gov.az/statHtml/statHtml.do?orgId=994&tblId=DT_AA_015&conn_path=I2)

26. <https://azstat.gov.az/statHtml/statHtml.do?orgId=994&tblId=DT_AF_002&conn_path=I2>

27. [https://www.stat.gov.az/menu/6/statistical_yearbooks/source/stat-](https://www.stat.gov.az/menu/6/statistical_yearbooks/source/stat-yearbook_2024.pdf)

[yearbook_2024.pdf](https://www.stat.gov.az/menu/6/statistical_yearbooks/source/stat-yearbook_2024.pdf)

28[.https://www.azstat.gov.az/portal/tblInfo/TblInfoList.do;JSESSIONID=3A60DF1](https://www.azstat.gov.az/portal/tblInfo/TblInfoList.do;JSESSIONID=3A60DF1EC3F4078B21E607A4E5AB39C5#994_001)

[EC3F4078B21E607A4E5AB39C5#994_001](https://www.azstat.gov.az/portal/tblInfo/TblInfoList.do;JSESSIONID=3A60DF1EC3F4078B21E607A4E5AB39C5#994_001)

29. <https://www.stat.gov.az/source/healthcare/>

[https://www.stat.gov.az/source/healthcare /](https://www.stat.gov.az/source/healthcare%20/)

30. [https://www.stat.gov.az/menu/6/statistical_yearbooks/,](https://www.stat.gov.az/menu/6/statistical_yearbooks/-) pp. 48, 52, 59, 64, 249

Corresponding Author: Mahira Firudin kizi Amirova, [gerayelmira@gmail.com](mailto:gerayelmira@gmail.com)
