# Supplementary material for: Marriage–Divorce Dynamics in Azerbaijan, 2014 – 2023: A Time-Series Study
Source: Research Square preprint supplement (doi:10.21203/rs.3.rs-7142167/v1), 2025-09-11
Supplement: Supplementary file 2 [file ae45a72b207c24f112e53816.docx]

**Dataset**

Dataset is available via **DOI:10.5281/zenodo.15710546,** https://zenodo.org/records/15710546
